# Supplementary material for: High temperature structural stability, electrical properties and chemical reactivity of NdBaCo2−xMnxO5+δ (0 ≤ x ≤ 2) for use as cathodes in solid oxide fuel cells
Source: Royal Society of Chemistry journal article supplement (doi:10.1039/c4ta03364g), 2014-01-01
Supplement: c4ta03364g1.pdf [file c4ta03364g1.pdf]

## Supporting information

### High temperature structural stability, electrical properties and chemical reactivity of $\text{NdBaCo}_{2-x}\text{Mn}_x\text{O}_{5+\delta}$ ( $0 \leq x < 2$ ) perovskites for use as cathode in Solid Oxide Fuel Cells.

Thibault Broux<sup>1</sup>, Mona Bahout<sup>1\*</sup>, James M. Hanlon<sup>1</sup>, Olivier Hernandez<sup>1</sup>, Serge Paofai<sup>1</sup>, Andrey Berenov<sup>2</sup> and Stephen J. Skinner<sup>2\*</sup>

<sup>1</sup>Institut des Sciences Chimiques de Rennes, Equipe « Chimie du Solide et Matériaux », UMR CNRS 6226, Université de Rennes 1, 263 Avenue du Général Leclerc, 35042 Rennes, France

<sup>2</sup>Department of Materials, Imperial College London, Exhibition Road, London SW7 2AZ, United Kingdom

### Results and discussion

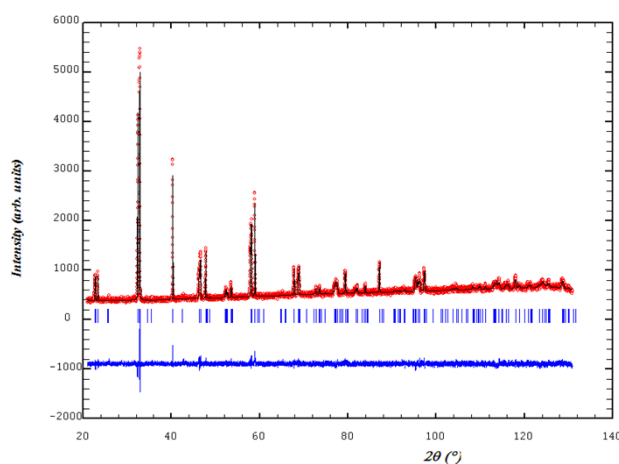

Figure S1. Measured, calculated and difference XRD patterns for  $\text{NdBaCo}_2\text{O}_{5+\delta}$ .

Table S1. Refined structural parameters for  $\text{NdBaCo}_2\text{O}_{5+\delta}$  from XRD data.

| Atoms | Site | <i>x</i> | <i>y</i> | <i>z</i> | Occupancy         |
|-------|------|----------|----------|----------|-------------------|
| Nd    | 1c   | 0        | 0        | 0.5      | 1.00 <sup>#</sup> |
| Ba    | 1a   | 0        | 0        | 0        | 1.00 <sup>#</sup> |
| Co    | 2t   | 0.5      | 0.5      | 0.250(2) | 1.00 <sup>#</sup> |
| O1    | 1f   | 0.5      | 0.5      | 0        | 1.00 <sup>#</sup> |
| O2    | 2t   | 0.5      | 0.5      | 0.278(1) | 1.00 <sup>#</sup> |
| O3    | 2s   | 0.5      | 0        | 0.278(1) | 1.00 <sup>#</sup> |
| O4    | 1h   | 0.5      | 0.5      | 0.5      | 0.76(1)           |

Space group  $Pmmm$ : # fixed,  $a = 3.94560(3) \text{ \AA}$ ,  $b = 3.95208(3) \text{ \AA}$ ,  $c = 7.57080(5) \text{ \AA}$ ,  $B_{\text{overall}} = 0.5(3) \text{ \AA}^2$ ,  $R_{\text{wp}} = 4.8\%$ ,  $R_p = 4.8\%$ ,  $R_{\text{Bragg}} = 7.0 \%$ ,  $\chi^2 = 1.36$ . The  $z$ -positions for O2 and O3 were constrained to be equal.

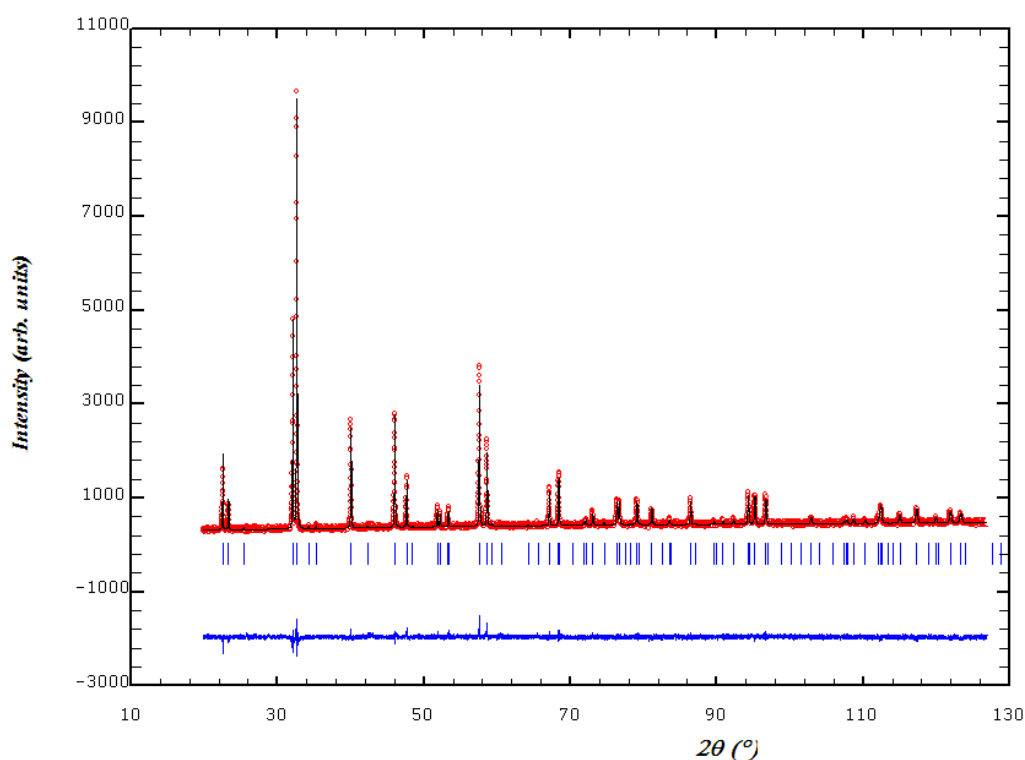

Figure S2. Measured, calculated and difference XRD patterns for  $\text{NdBaCo}_{1.5}\text{Mn}_{0.5}\text{O}_{5+\delta}$ .

**Table 2. Refined structural parameters for  $\text{NdBaCo}_{1.5}\text{Mn}_{0.5}\text{O}_{5+\delta}$  from XRD data.**

| Atoms | Site | $x$ | $y$ | $z$      | Occupancy              |
|-------|------|-----|-----|----------|------------------------|
| Nd    | 1a   | 0   | 0   | 0.5      | 1.00 <sup>#</sup>      |
| Ba    | 1b   | 0   | 0   | 0        | 1.00 <sup>#</sup>      |
| Co/Mn | 2h   | 0.5 | 0.5 | 0.256(3) | 0.75/0.25 <sup>#</sup> |
| O1    | 4i   | 0.5 | 0   | 0.299(1) | 1.00 <sup>#</sup>      |
| O2    | 1c   | 0.5 | 0.5 | 0        | 1.00 <sup>#</sup>      |
| O3    | 1d   | 0.5 | 0.5 | 0.5      | 0.60(2)                |

Space group  $P4/mmm$ : # fixed,  $a = 3.94016(4) \text{ \AA}$ ,  $c = 7.62584(6) \text{ \AA}$ ,  $B_{\text{overall}} = 0.4(2) \text{ \AA}^2$ ,  $R_{\text{wp}} = 5.55\%$ ,  $R_p = 4.35\%$ ,  $R_{\text{Bragg}} = 10.2\%$ ,  $\chi^2 = 1.52$ .

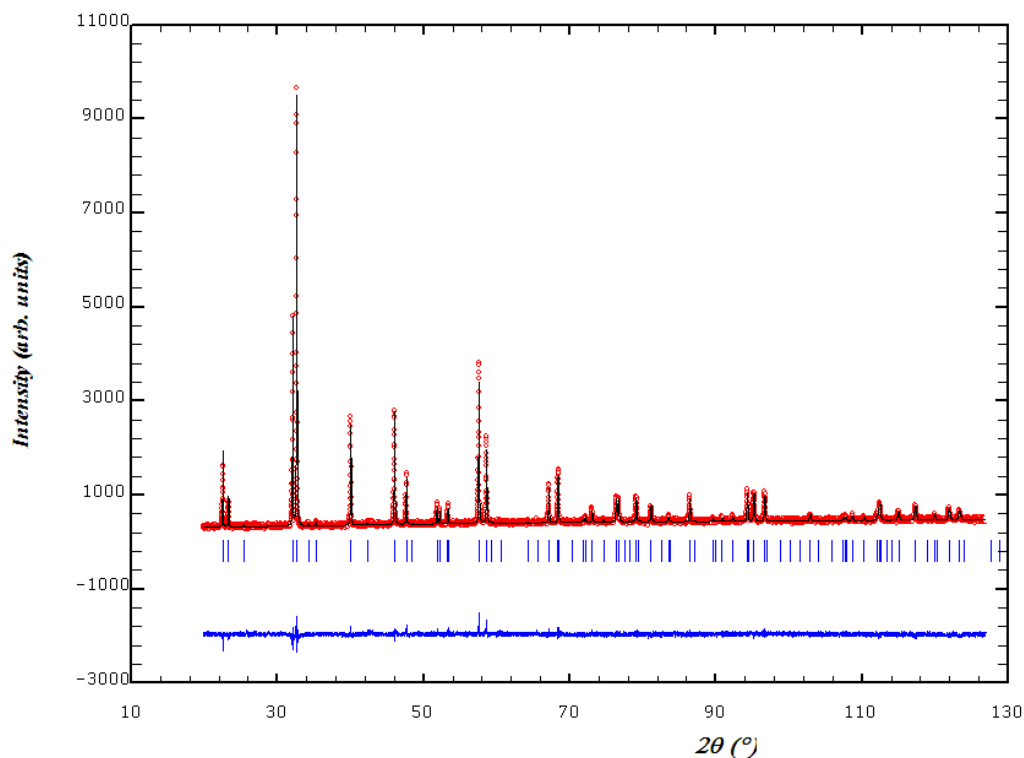

Figure S3. Measured, calculated and difference XRD patterns for NdBaCoMnO<sub>5+ $\delta$</sub> .

**Table 3. Refined structural parameters for NdBaCoMnO<sub>5+ $\delta$</sub>  from XRD data.**

| Atoms | Site | $x$ | $y$ | $z$      | Occupancy            |
|-------|------|-----|-----|----------|----------------------|
| Nd    | 1b   | 0   | 0   | 0.5      | 1.00 <sup>#</sup>    |
| Ba    | 1a   | 0   | 0   | 0        | 1.00 <sup>#</sup>    |
| Co/Mn | 2h   | 0.5 | 0.5 | 0.254(1) | 0.5/0.5 <sup>#</sup> |
| O1    | 4i   | 0.5 | 0   | 0.295(1) | 1.00 <sup>#</sup>    |
| O2    | 1c   | 0.5 | 0.5 | 0        | 1.00 <sup>#</sup>    |
| O3    | 1d   | 0.5 | 0.5 | 0.5      | 0.62(2)              |

Space group  $P4/mmm$ : # fixed,  $a = 3.92757(3)$  Å,  $c = 7.67617(6)$  Å,  $B_{overall} = 0.4(2)$  Å<sup>2</sup>,  $R_{wp} = 7.01\%$ ,  $R_p = 5.41\%$ ,  $R_{Bragg} = 14.4\%$ ,  $\chi^2 = 1.74$ .

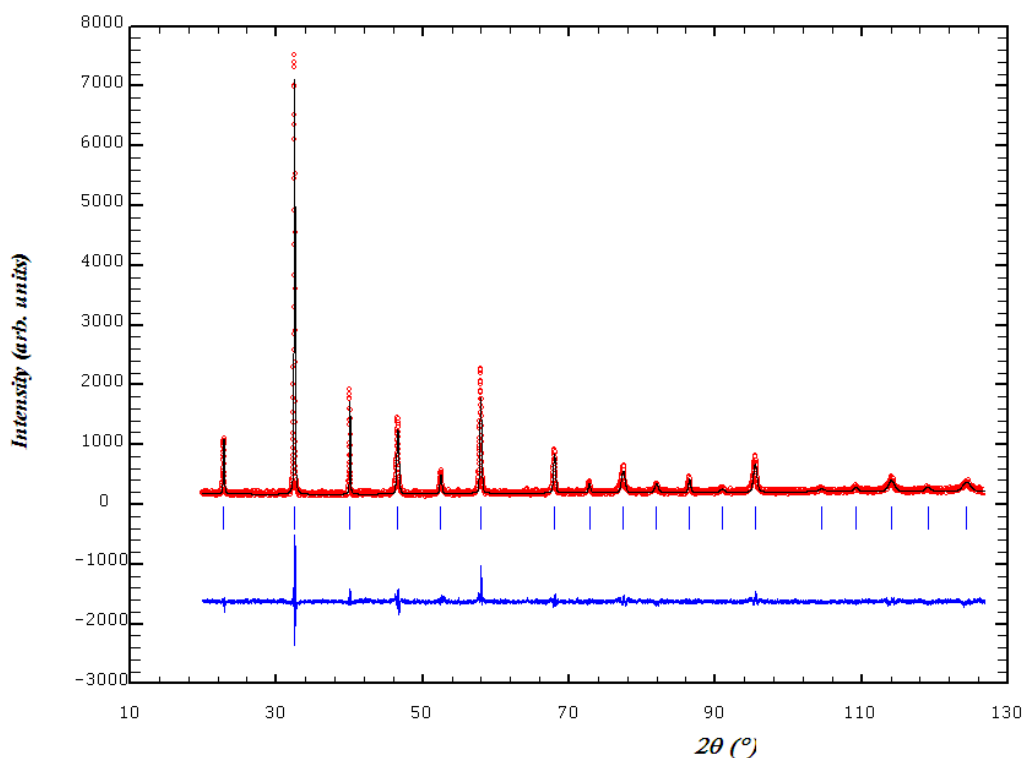

Figure S4. Measured, calculated and difference XRD patterns for NdBaCoMn<sub>1.5</sub>O<sub>5+ $\delta$</sub> .

**Table 4. Refined structural parameters for NdBaCo<sub>0.5</sub>Mn<sub>1.5</sub>O<sub>5+ $\delta$</sub>  from XRD data.**

| Atoms | Site       | <i>x</i> | <i>y</i> | <i>z</i> | Occupancy              |
|-------|------------|----------|----------|----------|------------------------|
| Nd/Ba | 1 <i>a</i> | 0        | 0        | 0        | 0.5/0.5 <sup>#</sup>   |
| Co/Mn | 1 <i>b</i> | 0.5      | 0.5      | 0.5      | 0.25/0.75 <sup>#</sup> |
| O     | 3 <i>c</i> | 0.5      | 0.5      | 0        | 0.90(2)                |

Space group *Pm-3m*: # fixed,  $a = 3.89518(5) \text{ \AA}$ ,  $B_{\text{overall}} = 0.2(1) \text{ \AA}^2$ ,  $R_{\text{wp}} = 9.43\%$ ,  $R_p = 7.33\%$ ,  $R_{\text{Bragg}} = 7.38\%$ ,  $\chi^2 = 2.24$ .

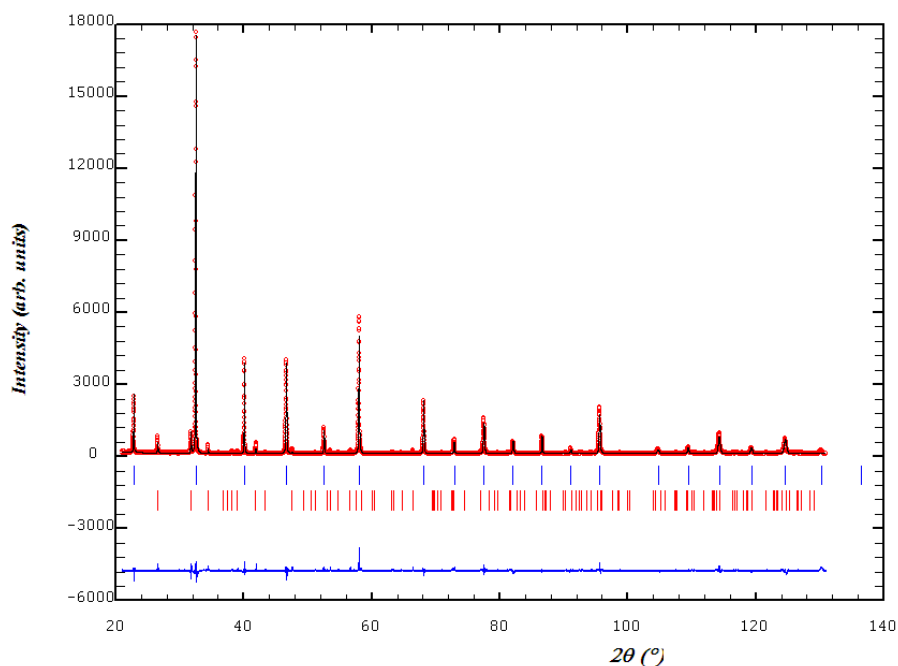

Figure S5. Measured, calculated and difference XRD patterns for  $\text{NdBaMn}_2\text{O}_{5+\delta}$ . The lower tick marks correspond to a hexagonal  $\text{BaMnO}_3$  impurity.

**Table 5. Refined structural parameters for  $\text{NdBaMn}_2\text{O}_{5+\delta}$  (99.9(3) wt %) from XRD data.**

| Atoms | Site | $x/a$ | $y/b$ | $z/c$ | Occupancy              |
|-------|------|-------|-------|-------|------------------------|
| Nd/Ba | 1a   | 0     | 0     | 0     | 0.5/0.5 <sup>#</sup>   |
| Co/Mn | 1b   | 0.5   | 0.5   | 0.5   | 0.25/0.75 <sup>#</sup> |
| O     | 3c   | 0.5   | 0.5   | 0     | 0.90(2)                |

Space group  $Pm-3m$ : # fixed,  $a = 3.89675(3) \text{ \AA}$ ,  $B_{\text{overall}} = 0.3(1) \text{ \AA}^2$ ,  $R_{\text{wp}} = 11.3\%$ ,  $R_p = 8.80\%$ ,  $R_{\text{Bragg}}(\text{NdBaMn}_2\text{O}_6) = 7.97\%$ ,  $\chi^2 = 2.62$ .
